# Supplementary material
Source: PubMed Central journal article supplement (PMC521975)

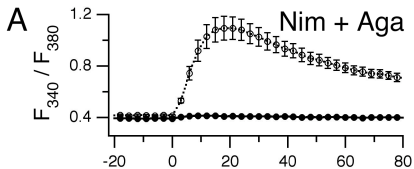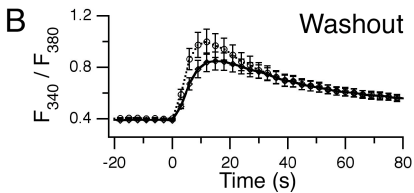

Supplement: pnas_101_40_14503__3.pdf [file pnas_101_40_14503__3.pdf]
